# Supplementary material for: scATAC-pro: a comprehensive workbench for single-cell chromatin accessibility sequencing data
Source: PubMed Central journal article supplement (PMC7169039; doi:10.1186/s13059-020-02008-0), 2020-04-20

## Supplementary Figures

**Fig S1. Effect of data binarization on clustering performance using simulated data with different levels of noise.** Data was simulated using a binomial distribution of read counts in peaks. Noise level was controlled using the parameter  $q$ .  $q = 0$  indicates no noise while  $q = 1$  indicates the highest level of noise. See methods for details. cisTopic and LSI can only use binarized data. The rest of the methods use non-binarized data by default although they can also use binarized data. **(A)** Adjusted rand index (ARI) for different methods, using the FACS-sorted cell types as the ground truth. **(B, C)** Performance of the same clustering algorithm using binarized and non-binarized data. ARI of Louvain clustering algorithm **(B)** and K-means algorithm **(C)** using 30 principal components calculated on different numbers of variable peaks.

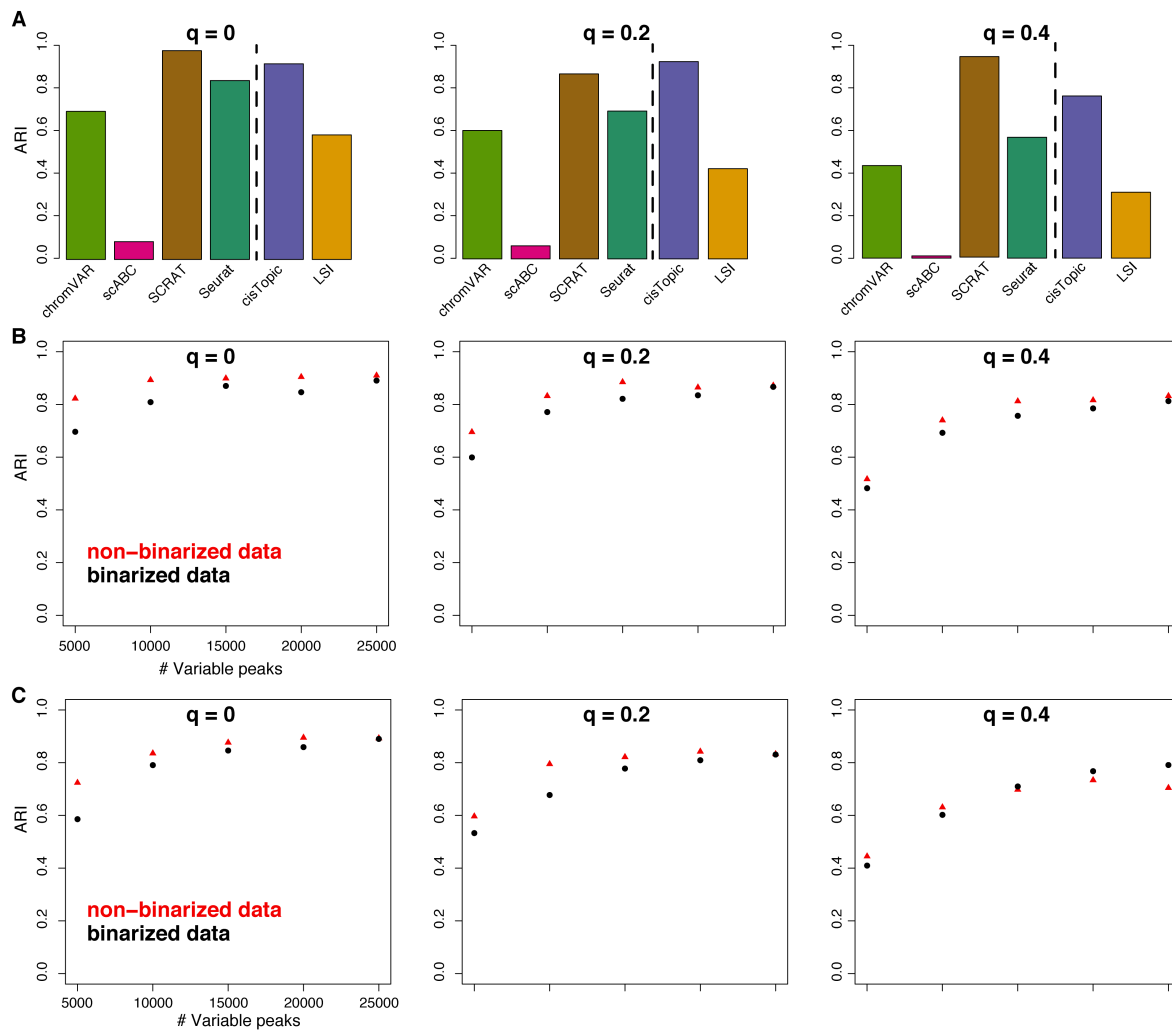

**Fig S2. Performance comparison of different clustering algorithms of existing tools using simulated and real data.** Simulated data was generated by subsampling aligned reads directly from bulk ATAC-seq data and no noise was introduced. **(A)** Adjusted rand index (ARI) for different algorithms using the FACS-sorted cell types as the ground truth. Cells of each type were subsampled with equal probability from a bulk ATAC-seq data set. **(B)** Computation time of each method. **(C)** Adjusted rand index of 100 sets of simulated data. Cells were sampled from the 13 types with different proportions. The proportions of different cell types were generated based on the Dirichlet distribution (with shape parameter  $\alpha = 3$  for each component). **(D)** Adjusted rand index for different algorithms using a real single-cell ATAC-seq data set (Buenrostro2018).

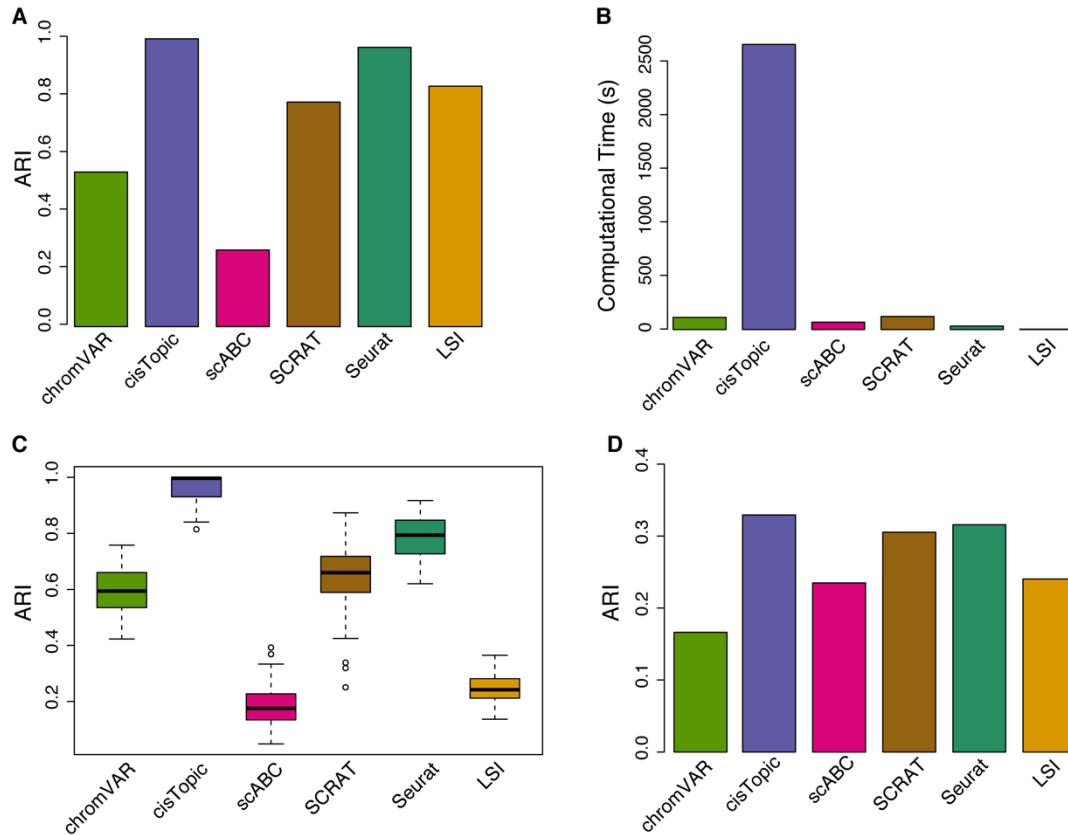

**Fig S3. Performance comparison of principal component analysis (PCA) implemented in Seurat and scATAC-pro (Seurat\_correct).** (A) Computation time as a function of the fraction of features (peaks) used. (B) Similarity of the clustering results based on PCA by Seurat and scATAC-pro. Clustering was done using the Louvain algorithm. Similarity was measured using the adjusted rand index.

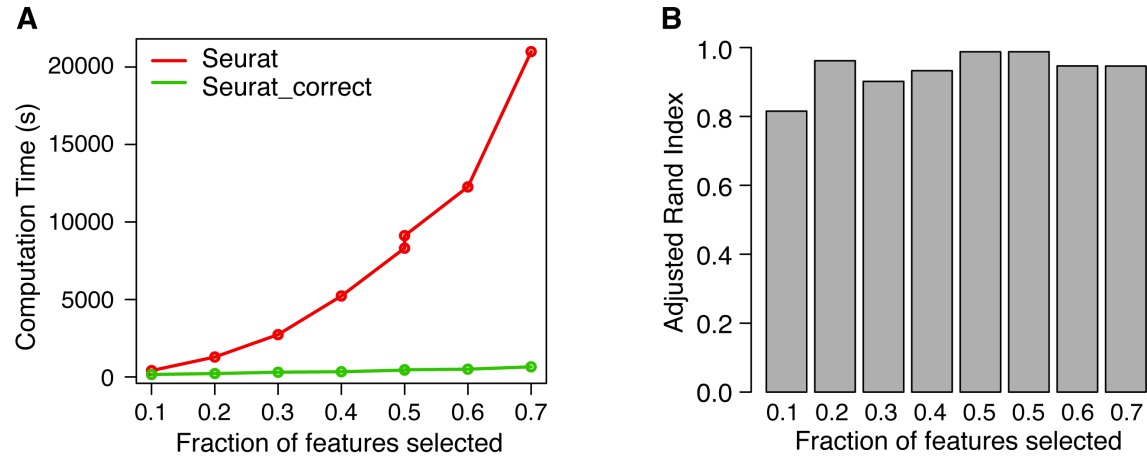

**Fig S4. Summary statistics for read mapping, library complexity, and cell calling of Buenrostro 2018 data set.** Global mapping statistics are based on all data (A). Cell barcode mapping statistics are based on called cells (B, C). MAPQ, mapping quality score.

| scATAC-pro Report      |                                  | Global QC                         | Cell Barcode QC             | Downstream Analysis |  |
|------------------------|----------------------------------|-----------------------------------|-----------------------------|---------------------|-------------------------------------------------------------------------------------|
| <b>A</b>               | <b>Global mapping statistics</b> | <b>B</b>                          | <b>Cell barcode summary</b> | <b>C</b>            | <b>Cell barcode mapping statistics</b>                                              |
| Sample: Buenrostro2018 |                                  | Cell called by FILTER             |                             | Total_pairs         | 420565191 100%                                                                      |
| Total_pairs            | 721497044 100%                   | Estimated number of cells         | 2065                        | Total_pairs_mapped  | 168966302 40.2%                                                                     |
| Total_pairs_mapped     | 415044825 57.5%                  | Median fragments per cell         | 24362                       | Total_uniq_mapped   | 265627443 63.2%                                                                     |
| Total_uniq_mapped      | 370747998 51.4%                  | Fraction of mapped reads in cells | 40.7%                       | Total_mito_mapped   | 89299919 21.2%                                                                      |
| Total_mito_mapped      | 191278321 26.5%                  | Fraction of MAPQ30 in cells       | 74.3%                       | Total_dups          | 267297950 63.6%                                                                     |
| Total_dups             | 504435953 69.9%                  |                                   |                             | Total_pairs_MAPQ30  | 144113853 34.3%                                                                     |
| Total_pairs_MAPQ30     | 353736920 49%                    |                                   |                             | Total_mito_MAPQ30   | 76675376 18.2%                                                                      |
| Total_mito_MAPQ30      | 163164746 22.6%                  |                                   |                             | Total_dups_MAPQ30   | 127675320 30.4%                                                                     |
| Total_dups_MAPQ30      | 309051781 42.8%                  |                                   |                             | Library complexity  | 19.6%                                                                               |
| Library complexity     | 19.5%                            |                                   |                             |                     |                                                                                     |

**Fig S5. Summary statistics for read mapping, library complexity, and cell calling of Cusanovich 2018 data set.** Global mapping statistics are based on all data (**A**). Cell barcode mapping statistics are based on called cells (**B, C**). MAPQ, mapping quality score. Note that this data was processed using a downloaded bam file since the barcode index file is not publicly available.

| scATAC-pro Report      |                                  |       | Global QC                         | Cell Barcode QC             | Downstream Analysis |  |                                        |      |
|------------------------|----------------------------------|-------|-----------------------------------|-----------------------------|---------------------|-------------------------------------------------------------------------------------|----------------------------------------|------|
| <b>A</b>               | <b>Global mapping statistics</b> |       | <b>B</b>                          | <b>Cell barcode summary</b> |                     | <b>C</b>                                                                            | <b>Cell barcode mapping statistics</b> |      |
| Sample: Cusanovich2018 |                                  |       |                                   |                             |                     |                                                                                     |                                        |      |
| Total_pairs            | 149024225                        | 100%  | Cell called by                    | FILTER                      |                     | Total_pairs                                                                         | 105219588 100%                         |      |
| Total_pairs_mapped     | 149024225                        | 100%  | Estimated number of cells         | 12336                       |                     | Total_pairs_mapped                                                                  | 105219588 100%                         |      |
| Total_uniq_mapped      | 149022861                        | 100%  | Median fragments per cell         | 4909                        |                     | Total_uniq_mapped                                                                   | 105219352 100%                         |      |
| Total_mito_mapped      | 0                                | 0%    | Fraction of mapped reads in cells | 70.6%                       |                     | Total_mito_mapped                                                                   | 0 0%                                   |      |
| Total_dups             | 2693797                          | 1.8%  | Fraction of MAPQ30 in cells       | 70.5%                       |                     | Total_dups                                                                          | 2005748 1.9%                           |      |
| Total_pairs_MAPQ30     | 134562544                        | 90.3% |                                   |                             |                     | Total_pairs_MAPQ30                                                                  | 94743381 90%                           |      |
| Total_mito_MAPQ30      | 0                                | 0%    |                                   |                             |                     | Total_mito_MAPQ30                                                                   | 0 0%                                   |      |
| Total_dups_MAPQ30      | 1654782                          | 1.1%  |                                   |                             |                     | Total_dups_MAPQ30                                                                   | 1300676 1.2%                           |      |
| Library complexity     |                                  | 100%  |                                   |                             |                     | Library complexity                                                                  |                                        | 100% |

**Fig S6. Quality assessment metrics for called single cells of Buenrostro 2018 data set.** (A) Plot of the fraction of fragments in peaks versus the total number of unique fragments. The plot can be used to distinguish cell barcodes from non-cell barcodes. (B) Distribution of insert fragment sizes. The plot can be used to evaluate the quality of transposase reaction. (C) Transcription start site (TSS) enrichment profile. (D) Distribution of the total number of unique fragments for cell and non-cell barcodes. The plot can be used to evaluate the amount of cell debris sequenced. (E) Boxplot of fragments overlapping annotated genomic regions per cell. (F) Overall statistics of data aggregated from all called cells.

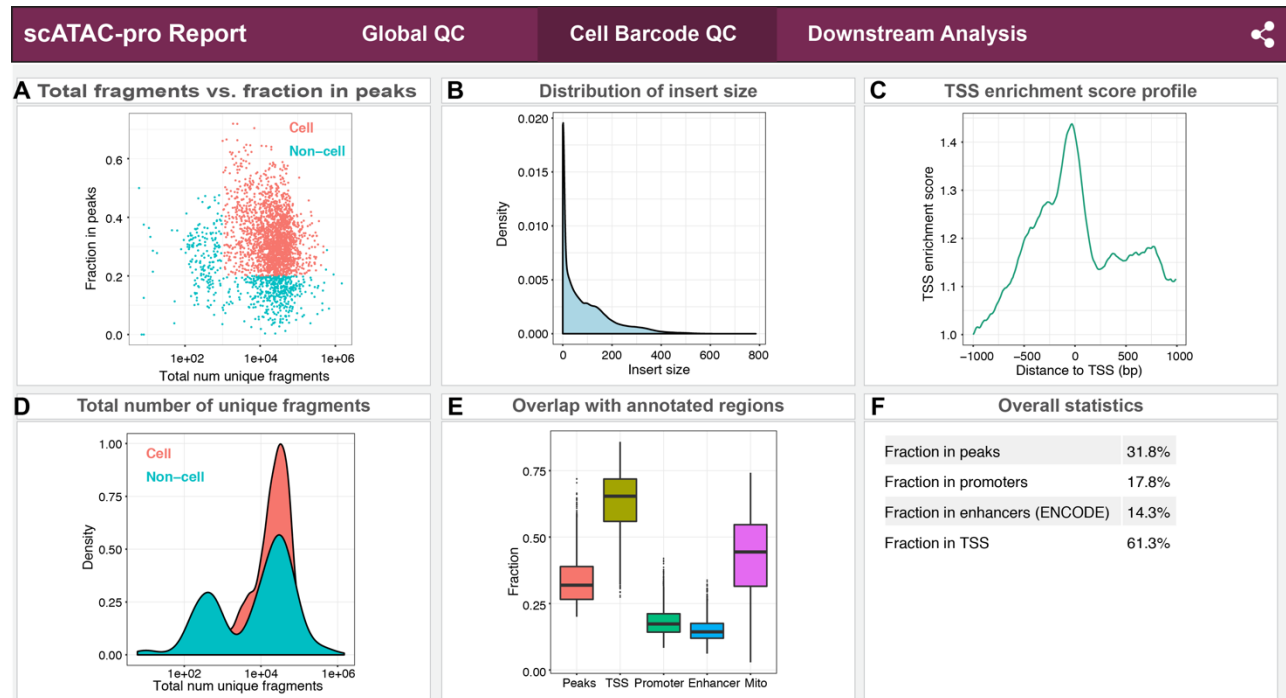

**Fig S7. Quality assessment metrics for called single cells of Cusanovich 2018 data set.** (A) Plot of the fraction of fragments in peaks versus the total number of unique fragments. The plot can be used to distinguish cell barcodes from non-cell barcodes. (B) Distribution of insert fragment sizes. The plot can be used to evaluate the quality of transposase reaction. (C) Transcription start site (TSS) enrichment profile. (D) Distribution of the total number of unique fragments for cell and non-cell barcodes. The plot can be used to evaluate the amount of cell debris sequenced. (E) Boxplot of fragments overlapping annotated genomic regions per cell. (F) Overall statistics of data aggregated from all called cells.

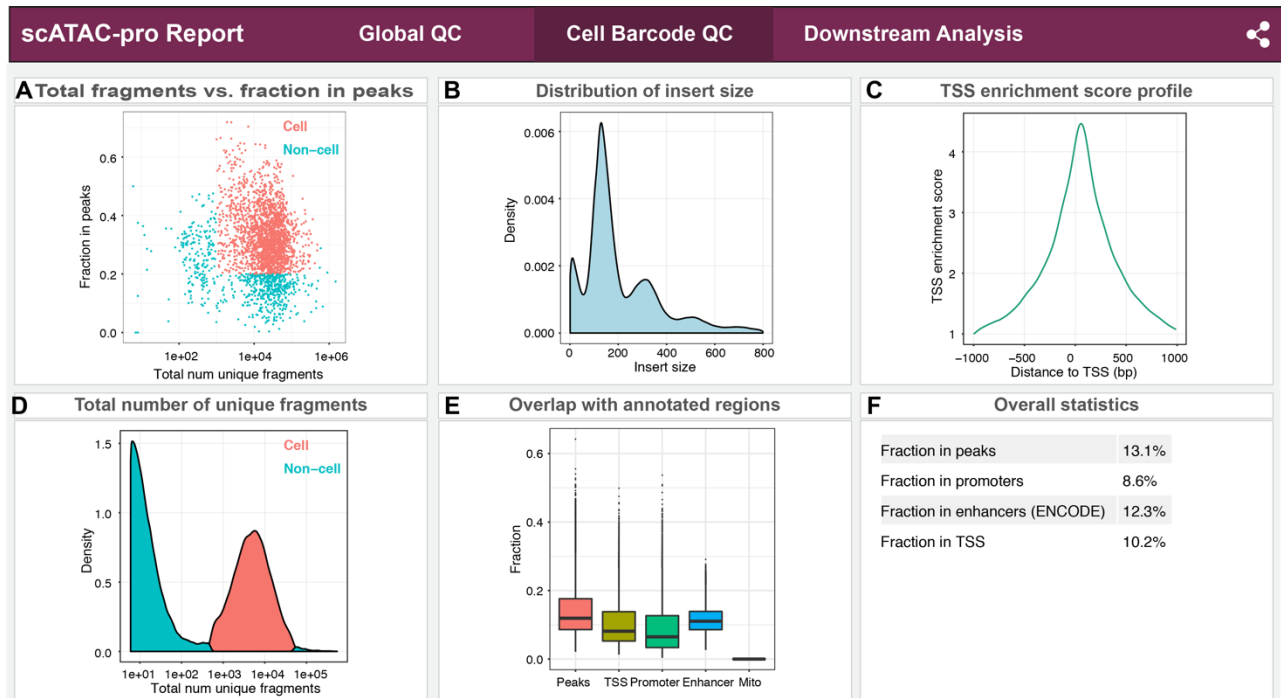

**Fig S8. Summary report for downstream analyses of Buenrostro 2018 data set.** Results of the following analyses are shown: clustering analysis (A), transcription factor (TF) motif enrichment analysis (B), differential footprinting analysis (between one cluster and the rest of the clusters) (C), enriched gene ontology (GO) terms for cluster0 (D), and predicted cis-interactions at *GATA1* locus (E).

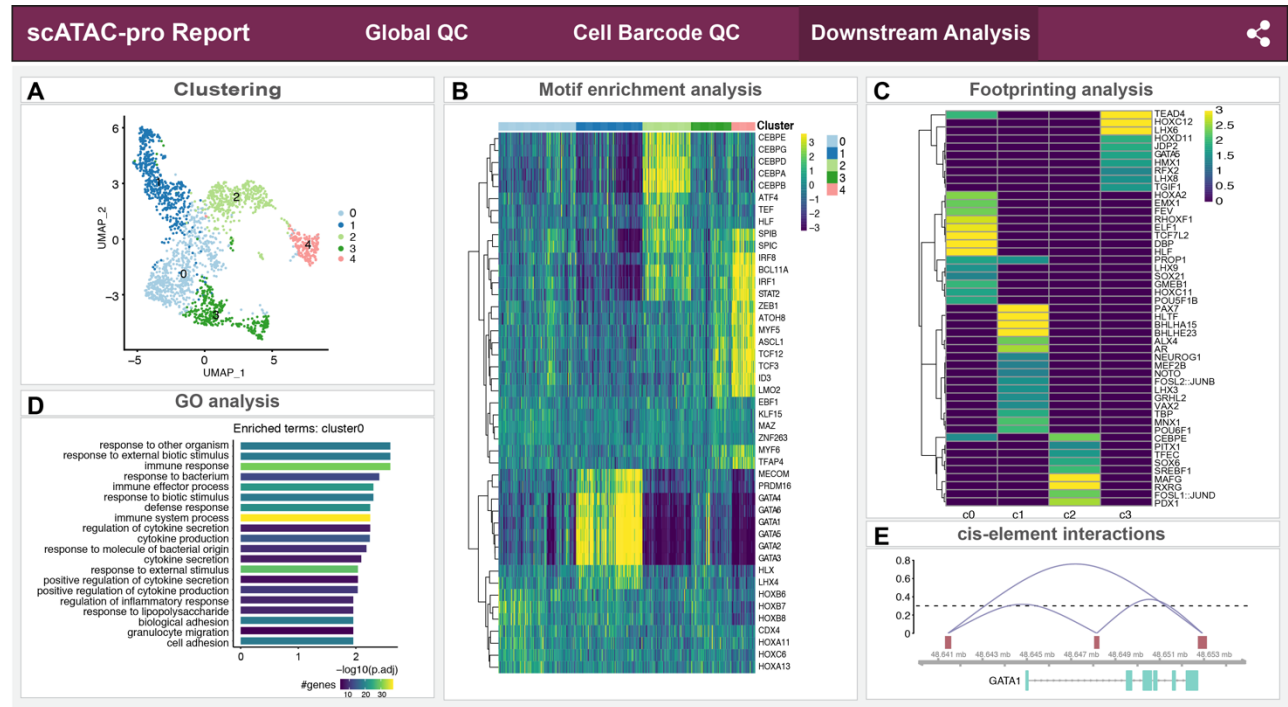



**Fig S9. Summary report for downstream analyses of Cusanovich 2018 data set.** Results of the following analyses are shown: clustering analysis (A), transcription factor (TF) motif enrichment analysis (B), differential footprinting analysis (between one cluster and the rest of the clusters) (C), enriched gene ontology (GO) terms for cluster8 (D), and predicted cis-interactions at *CEBPB* locus (E).

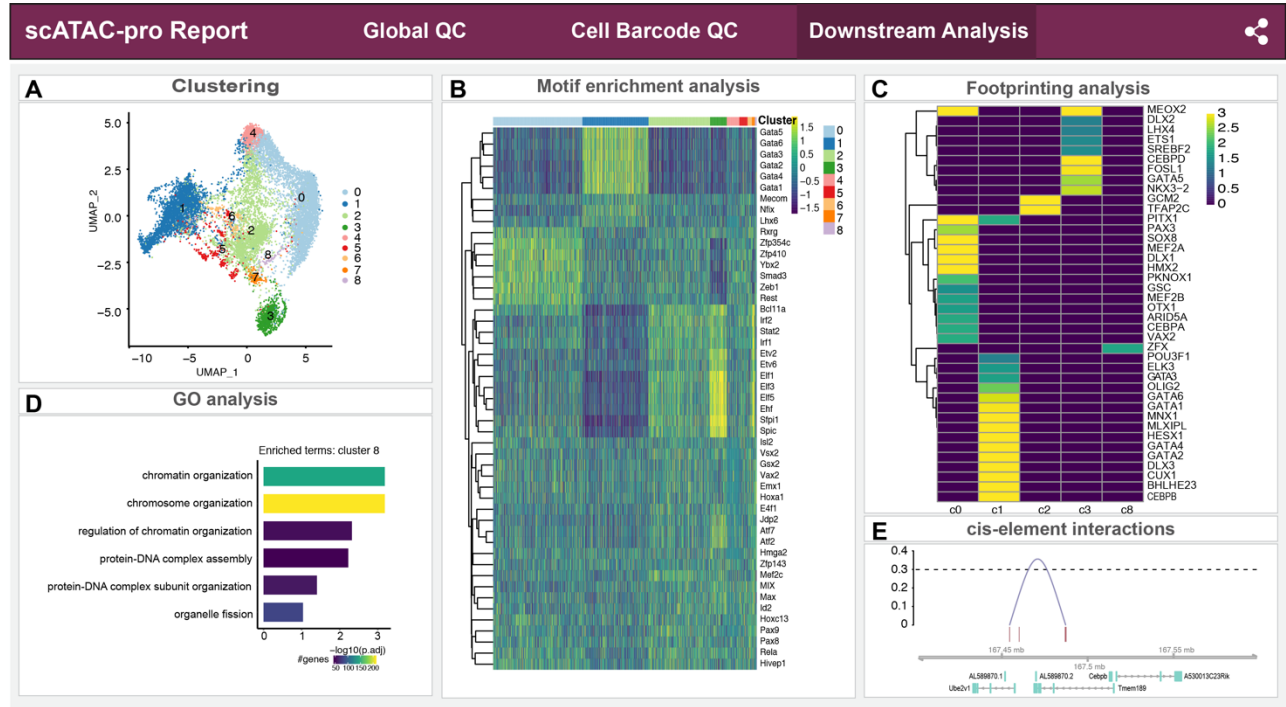

**Fig S10. Screenshot of the user interface of the visualization tool, *VisCello*.** scATAC-Seq data of human peripheral blood mononuclear cells (PBMCs) was used for illustration purpose. **(A)** Chromatin accessibility score of peak overlapping with the transcriptional start site of *MS4A1* is displayed. Users can use gene name or peak coordinate as the search keyword to explore the accessibility of interested regions. The raw and normalized data can be visualized using uniform manifold approximation and projection (UMAP) or t-distributed stochastic neighbor embedding (tSNE) with different numbers of principal components. **(B)** Differential chromatin accessibility analysis. The comparison can be done between any two groups of cells specified by the user. The resulting set of differential accessible regions and the heatmap are downloadable. Shown is the comparison between monocytic cell clusters (clusters 0, 6, 7, 8) versus T cell clusters (clusters 1, 2, 5).

A

Data Visualization Accessibility by Group

Choose Sample:   
 scATAC\_withGene2Peak

Choose Projection:   
 UMAP30

Color By   
 Peak Accessibility

Search feature:   
 chr11-60455504-60455911,MS4A1-Tss

Data scale   
 Normalized count

Choose Cells:   
 All cells

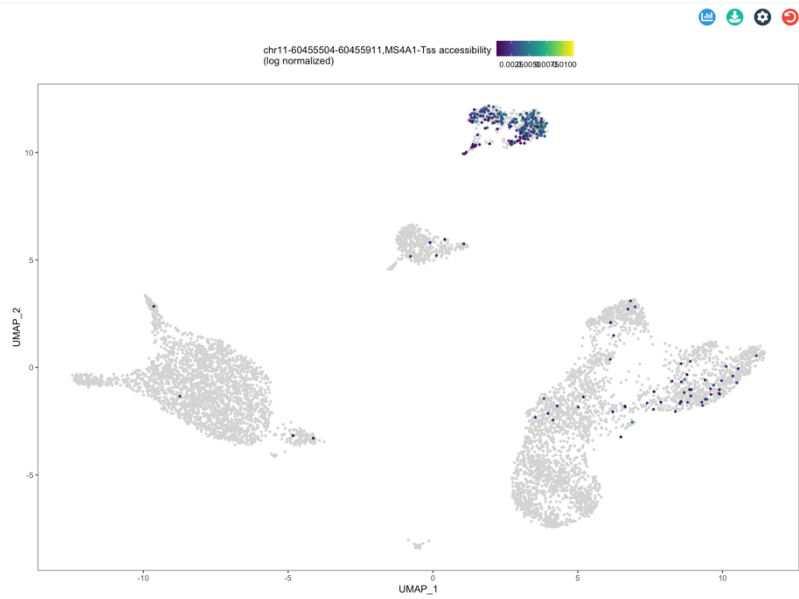

Hint: Mouse over points to see the detailed annotation. Drag on plots to select cells. Set plot aesthetics (legend etc.) using cog button on topright.

B

Choose Sample:   
 scATAC\_withGene2Peak

Meta Class   
 seurat\_clusters

Group 1   
 0 6 7 8

Group 2   
 1 2 5

✖ 0\_6\_7\_8 ✖ 1\_2\_5

Run DE

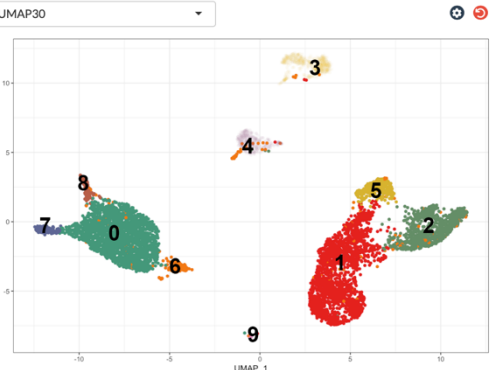

Hint: Mouse over points to see label.

| clusters | number_de_genes |
|----------|-----------------|
| 0        | 2894            |
| 1        | 1786            |

Showing 1 to 2 of 2 entries

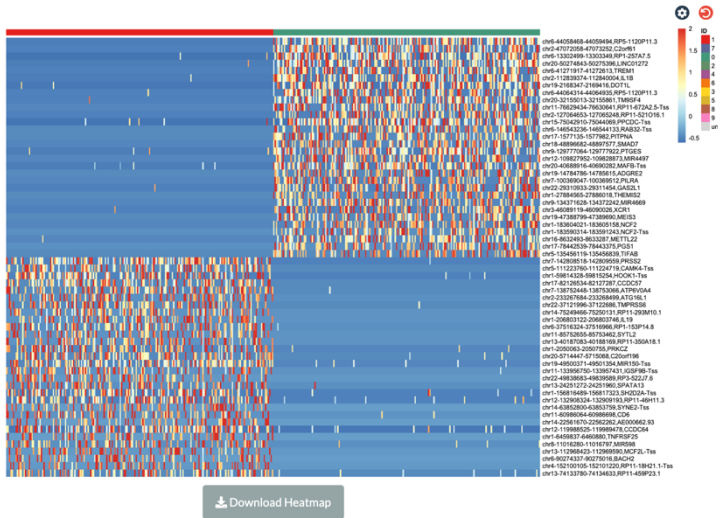

**Fig S11. Chromatin accessibility of transcription start site (TSS) of two dendritic cell markers *CST3* (A) and *FCER1A* (B) shown in UMAP and UCSC genome browser, respectively.**

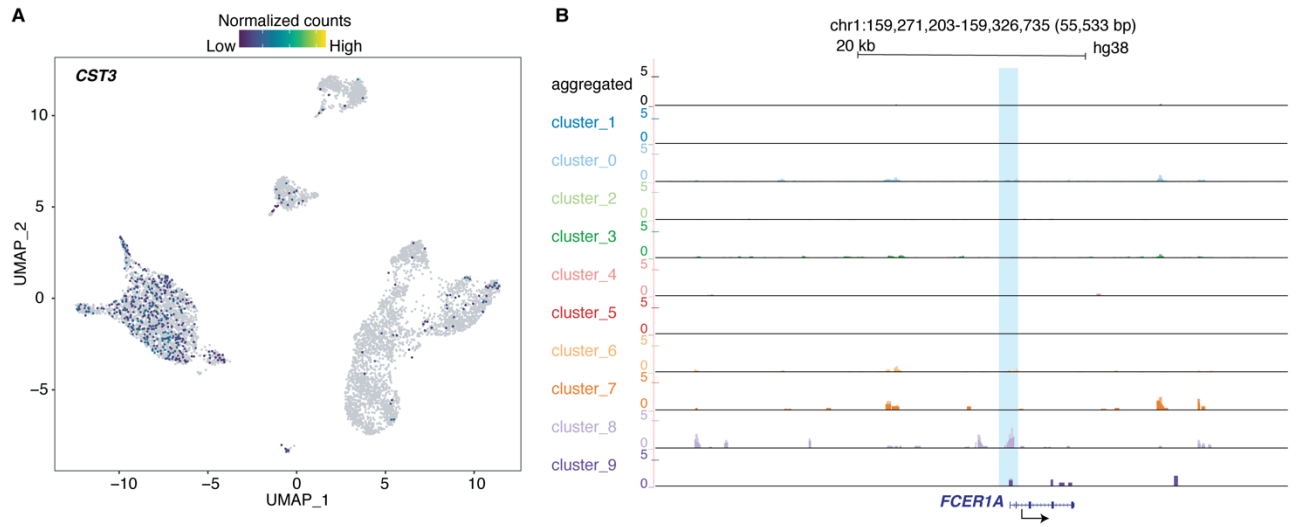

Supplement: 13059_2020_2008_MOESM1_ESM.pdf [file 13059_2020_2008_MOESM1_ESM.pdf]
