# Supplementary material for: scATAC-pro: a comprehensive workbench for single-cell chromatin accessibility sequencing data
Source: PubMed Central journal article supplement (PMC7169039; doi:10.1186/s13059-020-02008-0), 2020-04-20
Supplement: 13059_2020_2008_MOESM2_ESM.pdf [file 13059_2020_2008_MOESM2_ESM.pdf]

## Supplementary Tables

**Table S1. Comparison of the features of three comprehensive software for processing and analysis of single-cell chromatin accessibility sequencing data.** MDS, multidimensional scaling; NB, negative binomial; PLSA, probability latent semantic analysis; LSI, latent semantic indexing; LDA, latent Dirichlet allocation; UMAP, uniform manifold approximation and projection (UMAP); tSNE, t-distributed stochastic neighbor embedding.

|                                            | <b>Scasat</b>                         | <b>cellranger-atac</b>                             | <b>scATAC-pro</b>                                                  |
|--------------------------------------------|---------------------------------------|----------------------------------------------------|--------------------------------------------------------------------|
| Open source                                | Yes                                   | No                                                 | Yes                                                                |
| Preprocessing                              | Adapter trimming                      | Demultiplexing, adapter trimming                   | Demultiplexing, adapter trimming                                   |
| Read mapping                               | Bowtie2                               | BWA                                                | BWA, Bowtie, Bowtie2                                               |
| Peak calling                               | MACS2                                 | ZINBA [48]                                         | MACS2, GEM, BIN, COMBINED                                          |
| Cell calling                               | Filtering                             | Mixture of NB model                                | Filtering, EmptyDrop, Mixture of NB model                          |
| Dimension reduction                        | MDS, tSNE                             | PCA, LSI, PLSA, tSNE                               | PCA, LDA, LSI, tSNE, UMAP                                          |
| Clustering                                 | k-medoids on original features        | K-means, Louvain on features of reduced dimensions | Louvain, K-means on features of reduced dimensions, and cisTopic   |
| TF motif enrichment analysis               | No                                    | Custom code                                        | chromVAR,                                                          |
| TF footprinting analysis                   | No                                    | No                                                 | HINT                                                               |
| Differential accessibility analysis        | Information gain, Fisher's exact test | Custom model                                       | DESeq2, Wilcoxon test, logistic regression, negative binomial test |
| GO analysis                                | Yes                                   | No                                                 | ClusterProfiler                                                    |
| Summary report                             | No                                    | HTML                                               | HTML                                                               |
| Generation of Genome browser track files   | Yes                                   | No                                                 | Yes                                                                |
| Support of multiple experimental protocols | Yes                                   | No                                                 | Yes                                                                |
| Cis-chromatin interactions                 | No                                    | No                                                 | Cicero                                                             |
| Integration of multiple scCAS data sets    | No                                    | No                                                 | Seurat v3, Harmony, Pool                                           |
| Visualization                              | No                                    | No                                                 | VisCello                                                           |
